# Supplementary material for: A Cu2+ specific metallohydrogel: preparation, multi-responsiveness and pillar[5]arene-induced morphology transformation
Source: Royal Society of Chemistry journal article supplement (doi:10.1039/c5cc00976f), 2015-01-01
Supplement: c5cc00976f1.pdf [file c5cc00976f1.pdf]

## A Cu<sup>2+</sup> specific metallohydrogel: preparation, multi-responsiveness and pillar[5]arene-induced morphology transformation

Kecheng Jie, Yujuan Zhou, Bingbing Shi and Yong Yao\*

*Department of Chemistry, Zhejiang University, Hangzhou, Zhejiang 310027, P. R. China*

*Fax and Tel: +86-571-8795-3189; Email address: yaoyong@zju.edu.cn.*

### Electronic Supplementary Information (13 pages)

|                                                                                                    |     |
|----------------------------------------------------------------------------------------------------|-----|
| 1. <i>Materials and methods</i>                                                                    | S2  |
| 2. <i>Syntheses of compound <b>1</b> and model compound <b>M2</b></i>                              | S3  |
| 3. <i>UV-Vis studies of <b>1</b> before and after slightly acidification in water</i>              | S8  |
| 4. <i>TEM and SEM images of <b>1'</b> in water</i>                                                 | S9  |
| 5. <i>Gelation study of the metallogel</i>                                                         | S10 |
| 6. <i>Host–guest complexation between <b>WP5</b> and model compounds <b>M1H</b> and <b>M2H</b></i> | S11 |
| 7. <i>References</i>                                                                               | S13 |

### *1. Materials and methods*

All reagents including model compound **M1** were commercially available and used as supplied without further purification. Solvents were either employed as purchased or dried according to procedures described in the literature. Water-soluble pillar[5]arene was prepared according to a published procedure.<sup>S1</sup>  $^1\text{H}$  NMR and  $^{13}\text{C}$  HMR spectra were recorded with a Bruker Avance DMX 400 spectrophotometer using the deuterated solvent as the lock and the residual solvent or TMS as the internal reference. Low-resolution electrospray ionization mass spectra were recorded with a Bruker Esquire 3000 Plus spectrometer. High-resolution mass spectrometry experiments were performed with IonSpec 4.7 Tesla FTMS. Transmission electron microscopy investigations were carried out on a HITACHI HT-7700 instrument. Scanning electron microscopy investigations were carried out on a HITACHI SU-8010 instrument. UV-Vis spectra were taken on a PerkinElmer Lambda 35 UV-Vis spectrophotometer.

## 2. Syntheses of compound **1** and model compound **M2**

### 2.1 Synthesis of compound **1**

**Scheme S1.** Synthetic route to **1**.

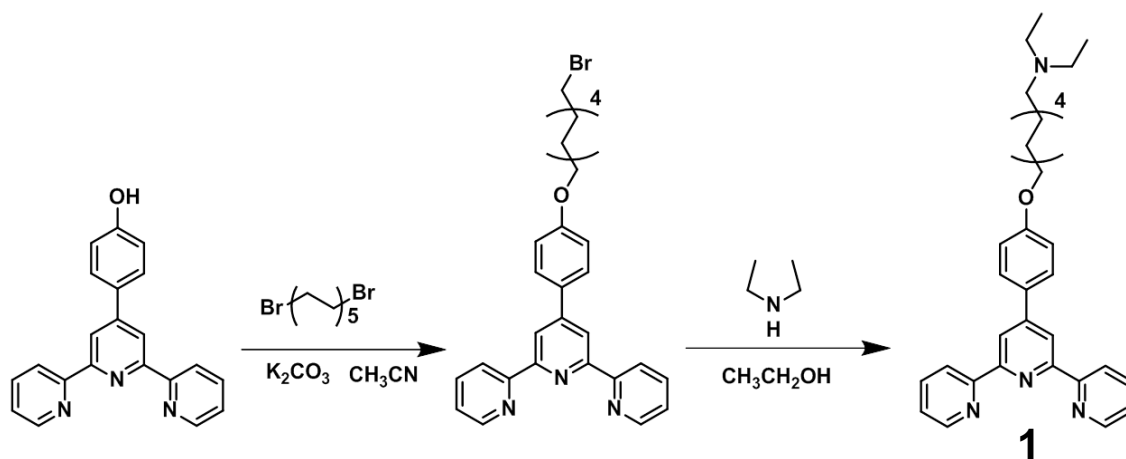

4-([2,2':6',2'']-terpyridin)-4'-yl)phenol (3.25 g, 10 mmol) and potassium carbonate (5.52 g, 40 mmol) was added to a solution of 1,10-dibromodecane (6.00 g, 20 mmol) in ethanol (350 mL) under vigorous stirring. The mixture was refluxed at 80 °C for 16 hours. After removal of the inorganic salt, the solvent was evaporated and the residue was purified by chromatography on silica gel (petroleum ether/ethyl acetate, 10:1) to give the crude product as a white solid. A mixture of the crude product with excess diethylamine (30 equiv) were dissolved in ethanol and refluxed for 24 h. The solvent was evaporated, and the residue was poured into a NaOH solution (1.00 M, 400 mL) and stirred. The solution was extracted with ethyl acetate (3 × 100 mL), and the organic phase was obtained. The oil yellow liquid was isolated after evaporation of the solution as the crude product, which was distilled in vacuo to give **1** as a solid. The yield of **1** was 87%. The <sup>1</sup>H NMR spectrum of **1** is shown in Fig. S1. <sup>1</sup>H NMR (400 MHz, chloroform-*d*, 293 K)  $\delta$  (ppm): 1.04–1.08 (t,  $J$  = 8 Hz, 6H), 1.26–1.31 (m, 14H), 1.41–1.49 (m, 4H), 1.79–1.86 (m, 2H), 2.39–2.43 (t,  $J$  = 8 Hz, 2H), 2.50–2.55 (m, 4H), 4.01–4.05 (t,  $J$  = 8 Hz, 2H), 7.01–7.03 (d, 2H), 7.37–7.34 (m, 2H), 7.90–7.86 (m, 4H), and 8.66–8.74 (m, 6H). The <sup>13</sup>C NMR spectrum of **1** is shown in Fig. S2. <sup>13</sup>C NMR (100 MHz, chloroform-*d*, 293 K)  $\delta$  (ppm): 160.14, 156.44, 155.83, 149.84, 149.11, 136.86, 130.48, 128.49, 123.75, 121.38, 118.25, 114.86, 76.70, 68.15, 52.96, 46.85, 29.63, 29.57, 29.54, 29.41, 29.28, 27.74, 26.85, 26.06, 11.57. LRESIMS is shown in Fig. S3:  $m/z$  537.4 [**1** + H]<sup>+</sup>. HRESIMS is shown in Fig. S4:  $m/z$  calcd for [**1** + H]<sup>+</sup> C<sub>35</sub>H<sub>45</sub>N<sub>4</sub>O<sup>+</sup>, 537.3588; found 537.3578; error – 1.9 ppm.

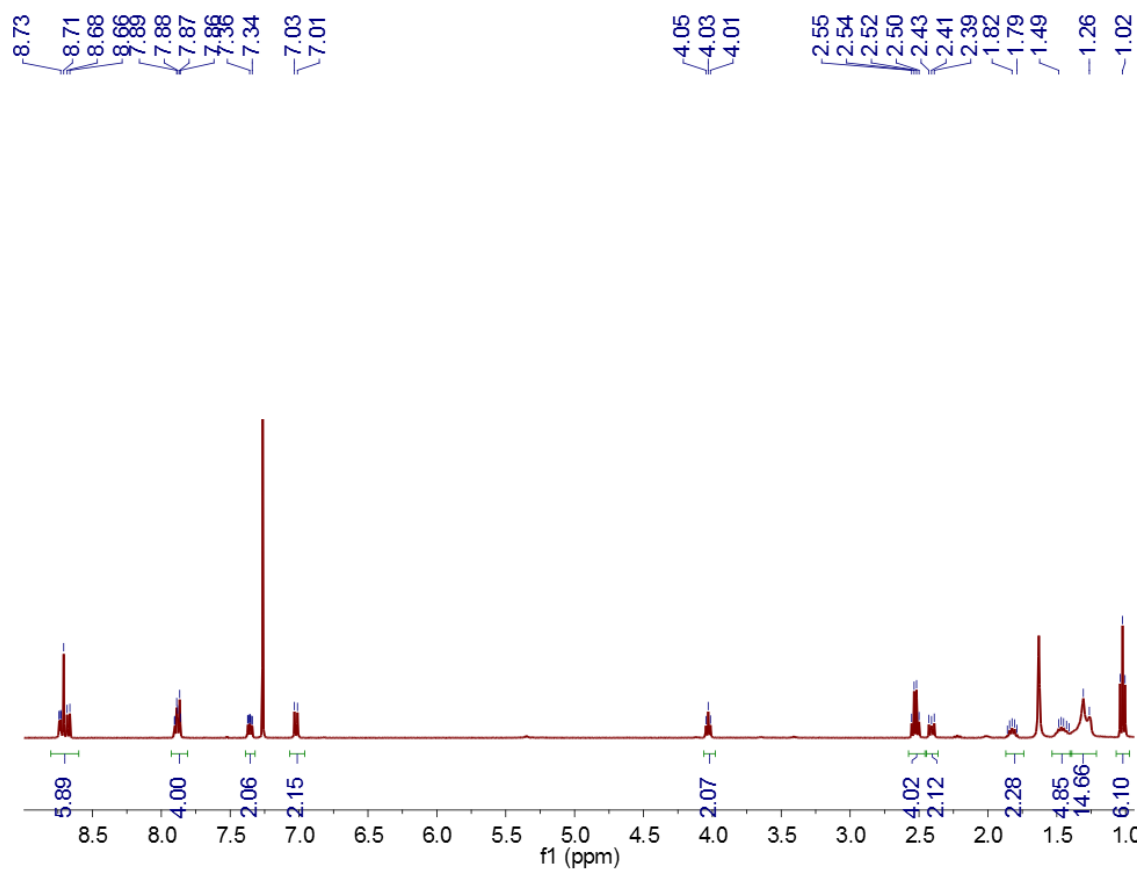

**Fig. S1** <sup>1</sup>H NMR spectrum (400 MHz, chloroform-*d*, 293K) of **1**.

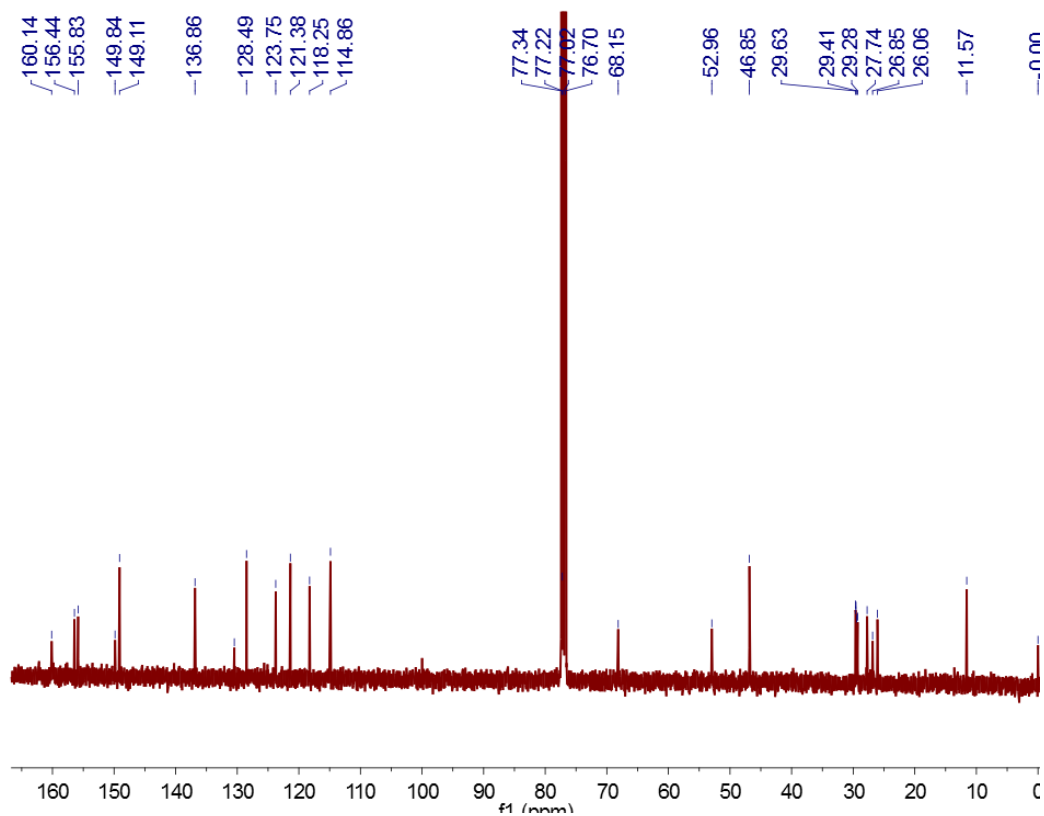

**Fig. S2** <sup>13</sup>C NMR spectrum (100 MHz, chloroform-*d*, 293K) of **1**.

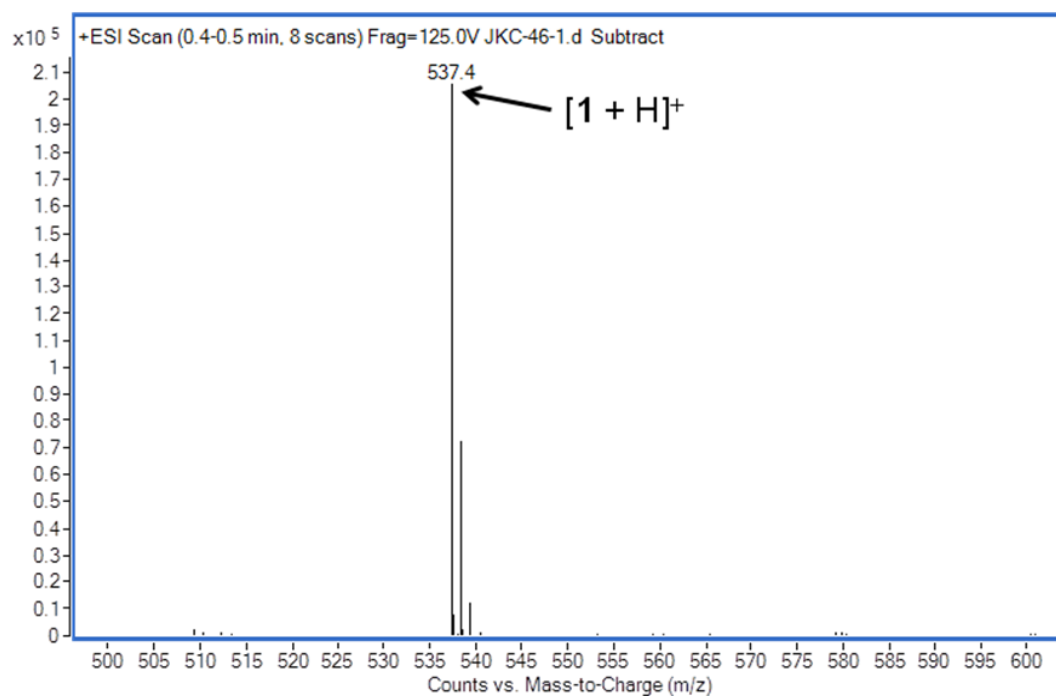

**Fig. S3** Electrospray ionization mass spectra of **1**.

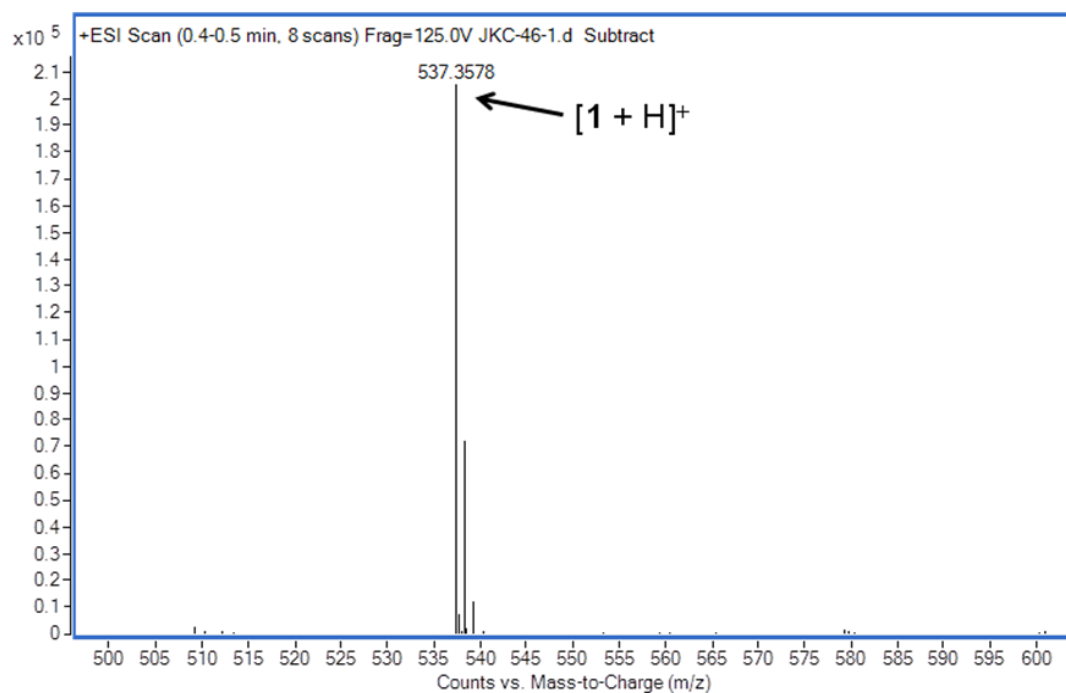

**Fig. S4** High resolution electrospray ionization mass spectra of **1**.

## 2.2 Synthesis of model compound **M2**

**Scheme S2.** Synthetic route to **M2**.

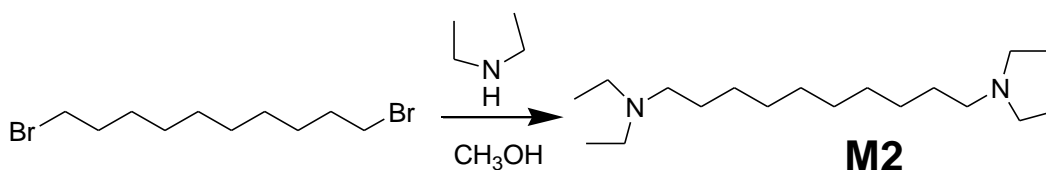

A mixture of 1,10-dibromodecane (3.00 g, 10.0 mmol) with excess diethylamine (30 equiv) were dissolved in ethanol and refluxed for 24 h. The solvent was evaporated, and the residue was poured into a NaOH solution (1.00 M, 400 mL) and stirred. The solution was extracted with ethyl acetate ( $3 \times 50$  mL), and the organic phase was obtained. The yellow liquid was isolated after evaporation of the solution as the crude product, which was distilled in vacuo to give **M2** as yellow liquid. The yield of **M2** was 88%. The  $^1\text{H}$  NMR spectrum of **M2** is shown in Fig. S5.  $^1\text{H}$  NMR (400 MHz, chloroform-*d*, 293 K)  $\delta$  (ppm): 2.54–2.49 (m, 4H), 2.39 (t,  $J = 8$  Hz, 4H), 1.45–1.42 (m, 4H), 1.28 (s, 12H), 1.02 (t,  $J = 6$  Hz, 12H). The  $^{13}\text{C}$  NMR spectrum of **M2** is shown in Fig. S6.  $^{13}\text{C}$  NMR (100 MHz, chloroform-*d*, 293 K)  $\delta$  (ppm): 55.06, 52.97, 46.84, 30.95, 29.63, 29.59, 29.74, 26.91, 11.62. LRESIMS is shown in Fig. S7:  $m/z$  285.2 [**M2** + H] $^+$ . HRESIMS  $m/z$  calcd for **M2**  $\text{C}_{18}\text{H}_{40}\text{N}_2$ , 284.3191; found 284.3187; error  $-1$  ppm.

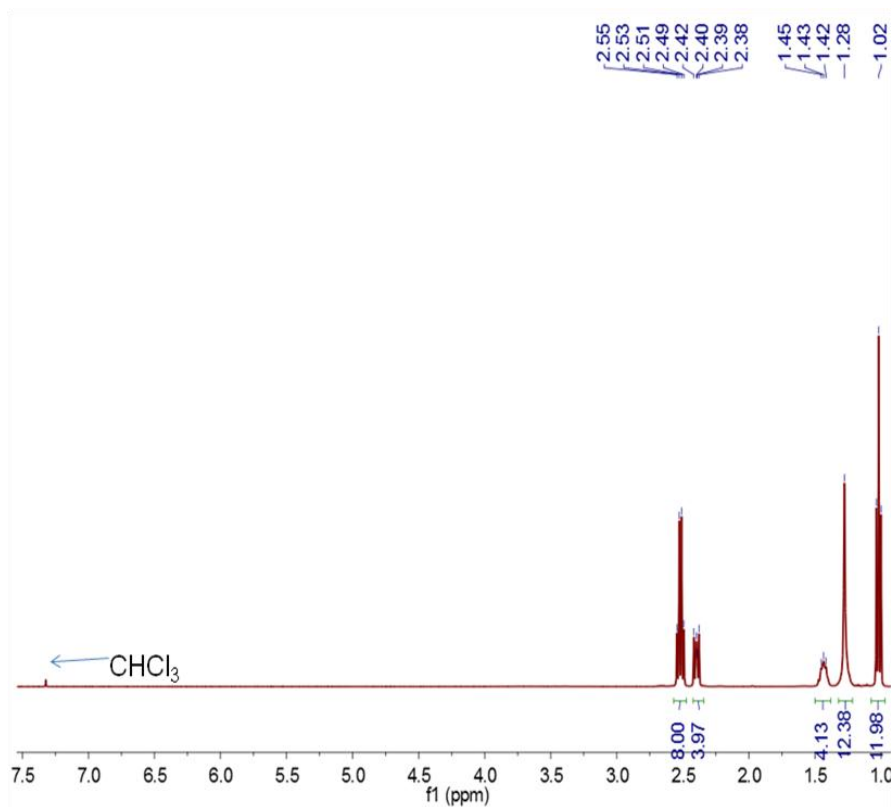

**Fig. S5**  $^1\text{H}$  NMR spectrum (400 MHz, chloroform-*d*, 293 K) of **M2**.

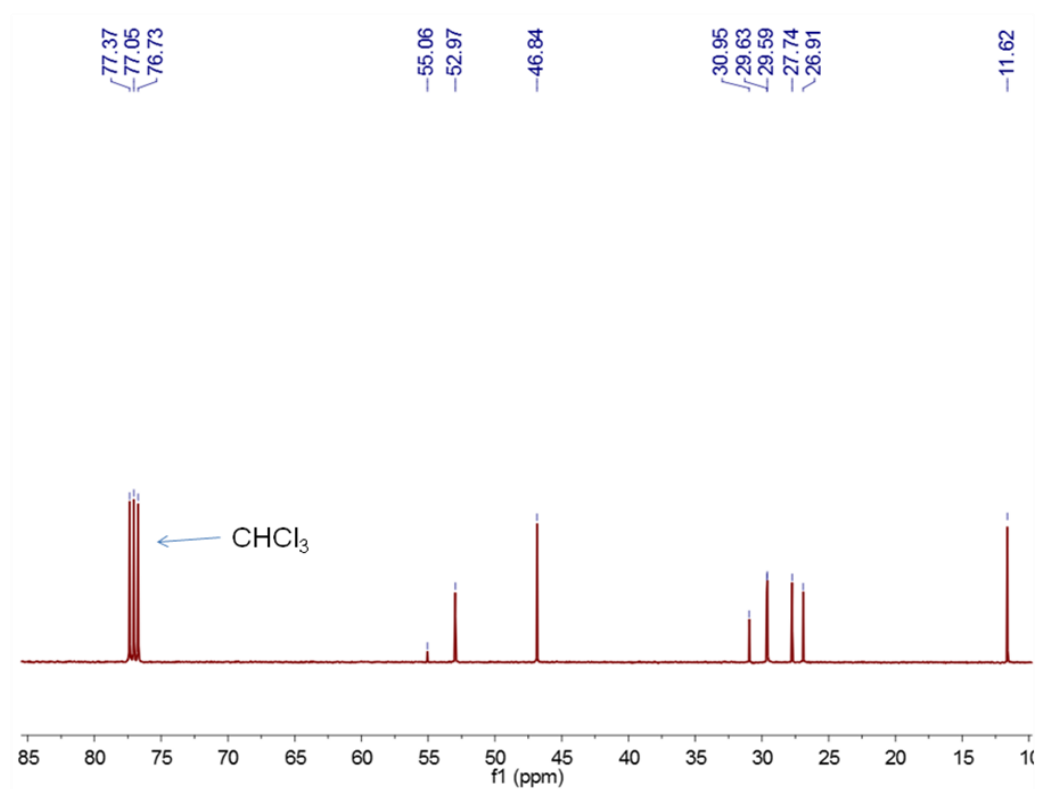

**Fig. S6**  $^{13}\text{C}$  NMR spectrum (100 MHz, chloroform-*d*, 293 K) of **M2**.

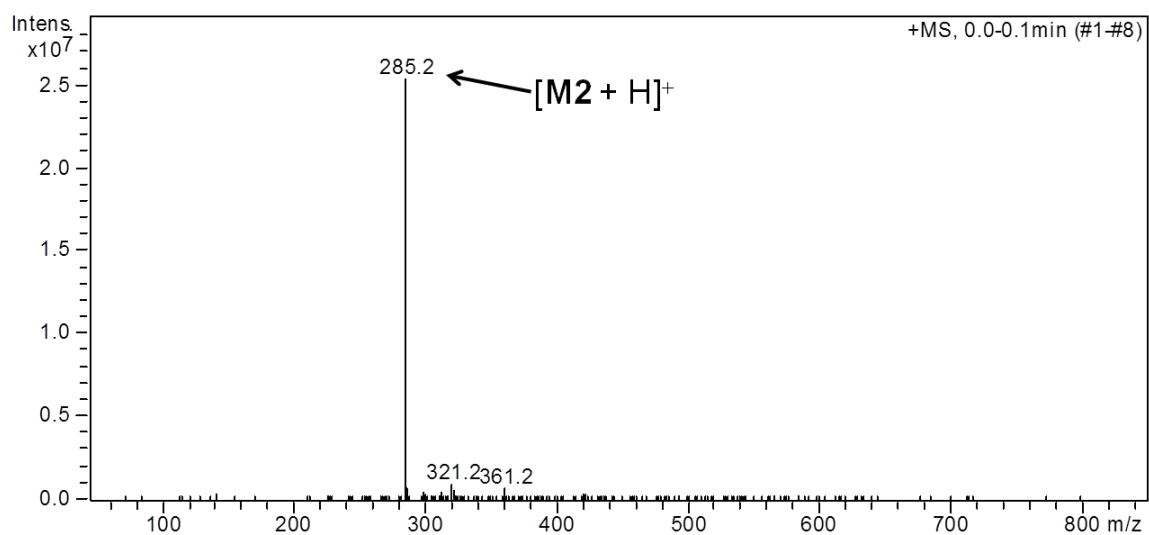

**Fig. S7** Electrospray ionization mass spectrum of **M2**.

3. UV-Vis studies of **1** before and after slightly acidification in water

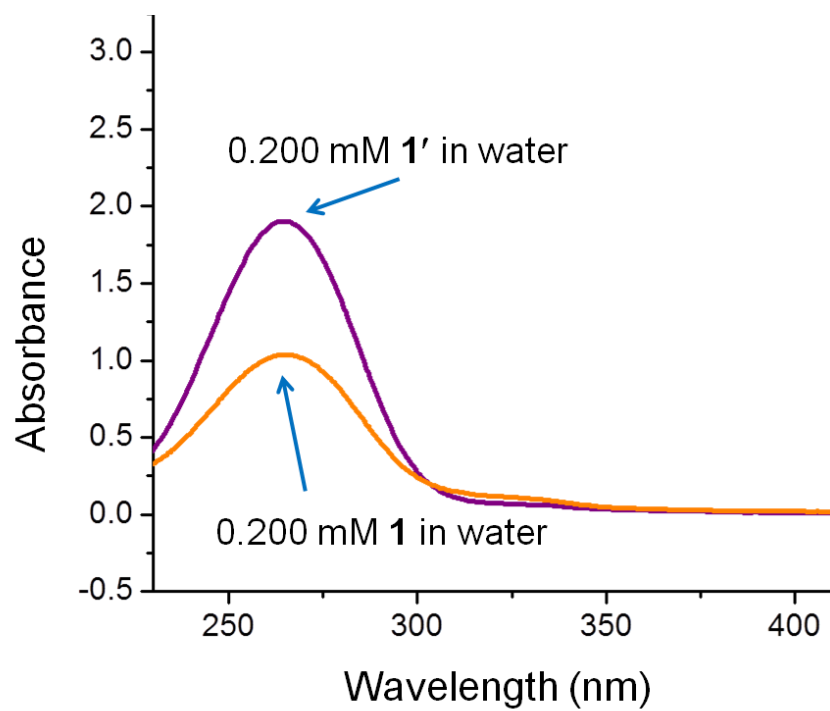

**Fig. S8** UV-Vis spectra of 0.200 mM **1** and **1'** in water.



4. TEM and SEM images of **1'** in water

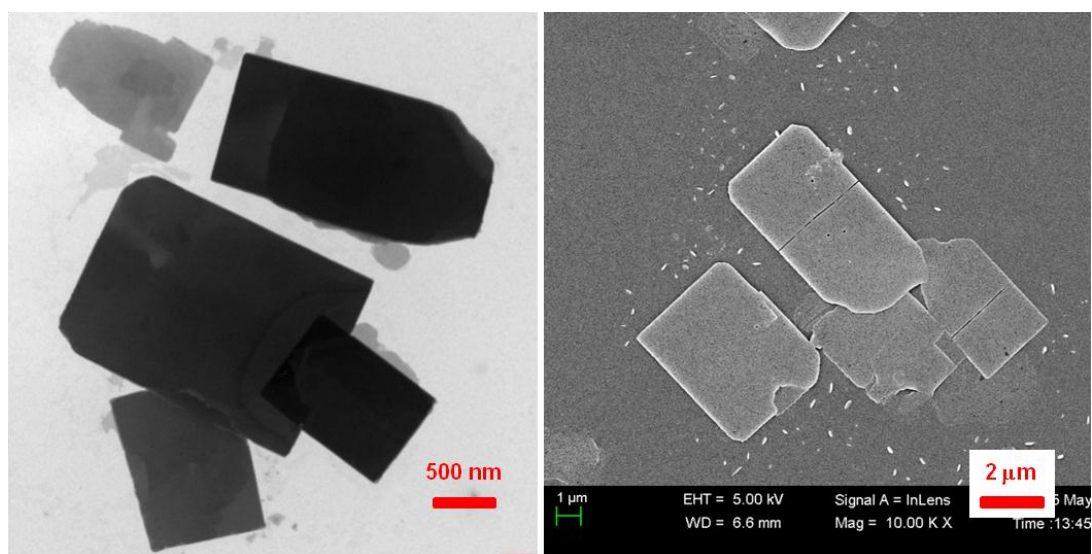

**Fig. S9** (a) TEM and (b) SEM images of the brick-like structures formed by **1'** (0.200 mM) in water.

## 5. Gelation study of the metallogel:

### 5.1 Gelation study of the metallogel with $\text{Cu}^{2+}$ in presence of other metal ions:

To a stock solution of **1'** (800  $\mu\text{L}$ , 0.25 mM) taken in a test bottle, a mixture of 100  $\mu\text{L}$  of  $\text{M}^{2+}$  (0.200 mM  $\text{Cd}^{2+}/\text{Zn}^{2+}/\text{Ni}^{2+}/\text{Ca}^{2+}/\text{Rh}^{2+}/\text{Fe}^{2+}/\text{Mg}^{2+}/\text{Co}^{2+}/\text{Mn}^{2+}$ ) and 100  $\mu\text{L}$  of  $\text{CuCl}_2$  (0.200 mM in  $\text{H}_2\text{O}$ ) was added and allowed to stand after gentle shaking. It was observed that most of the metal ions disturbed the gelation while the presence of  $\text{Ca}^{2+}$  resulted in a partial gel.

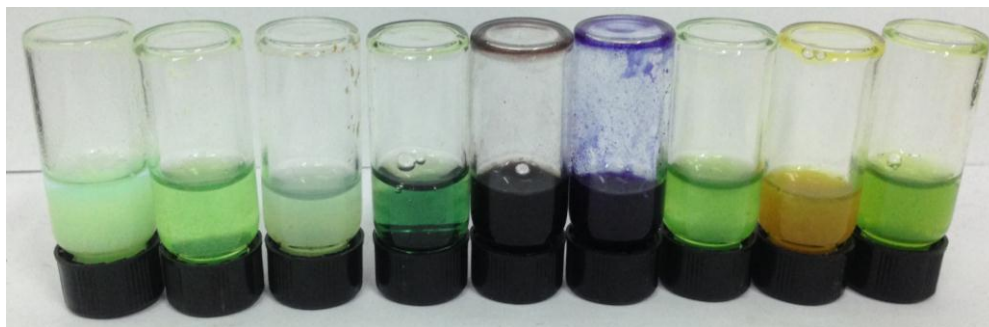

**Fig. S10** From left to right: 0.200 mM of **1'** in presence of 0.200 mM (chloride salt of)  $\text{Cd}^{2+}/\text{Cu}^{2+}$ ,  $\text{Zn}^{2+}/\text{Cu}^{2+}$ ,  $\text{Ni}^{2+}/\text{Cu}^{2+}$ ,  $\text{Ca}^{2+}/\text{Cu}^{2+}$ ,  $\text{Rh}^{2+}/\text{Cu}^{2+}$ ,  $\text{Fe}^{2+}/\text{Cu}^{2+}$ ,  $\text{Mg}^{2+}/\text{Cu}^{2+}$ ,  $\text{Co}^{2+}/\text{Cu}^{2+}$ , and  $\text{Mn}^{2+}/\text{Cu}^{2+}$ .

### 5.2 Gelation study of the metallogel in the presence of $\text{Cu}^{2+}$ with other counter anions:

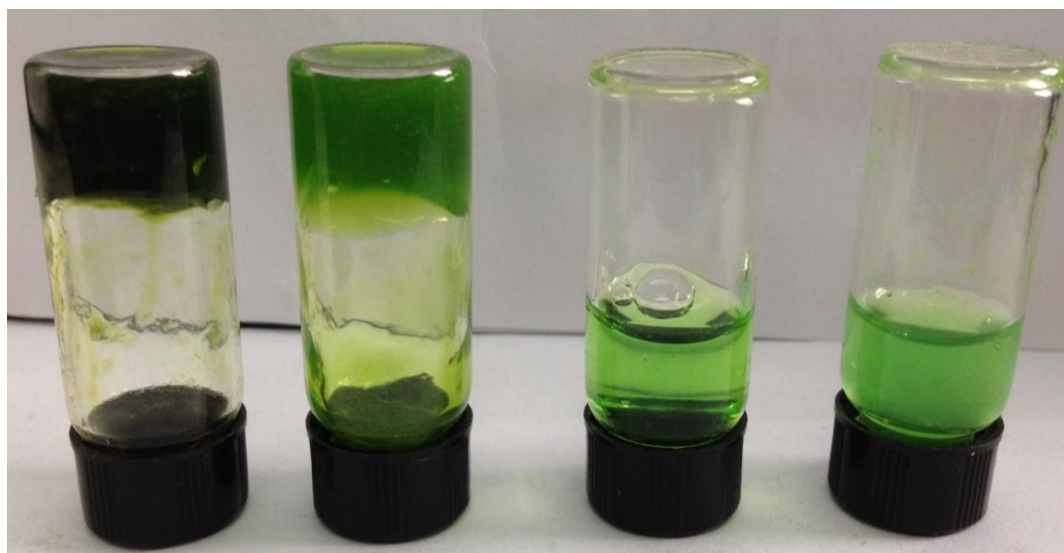

**Fig. S11** From left to right: 0.200 mM of **1'** in presence of 0.200 mM  $\text{CuBr}_2$ ,  $\text{CuI}_2$ ,  $\text{Cu}(\text{OAc})_2$  and  $\text{CuSO}_4$ .

6. Host–guest complexation between **WP5** and model compounds **M1H** and **M2H**

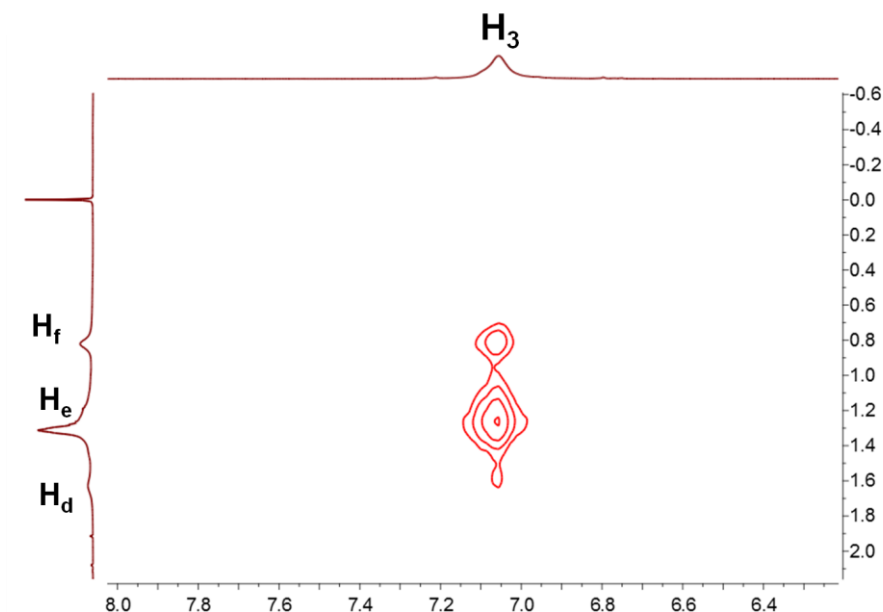

**Fig. S12** 2D NOESY NMR (500 MHz, D<sub>2</sub>O, 293 K) spectrum of a solution of **WP5** (5.00 mM) and **M1H** (5.00 mM).

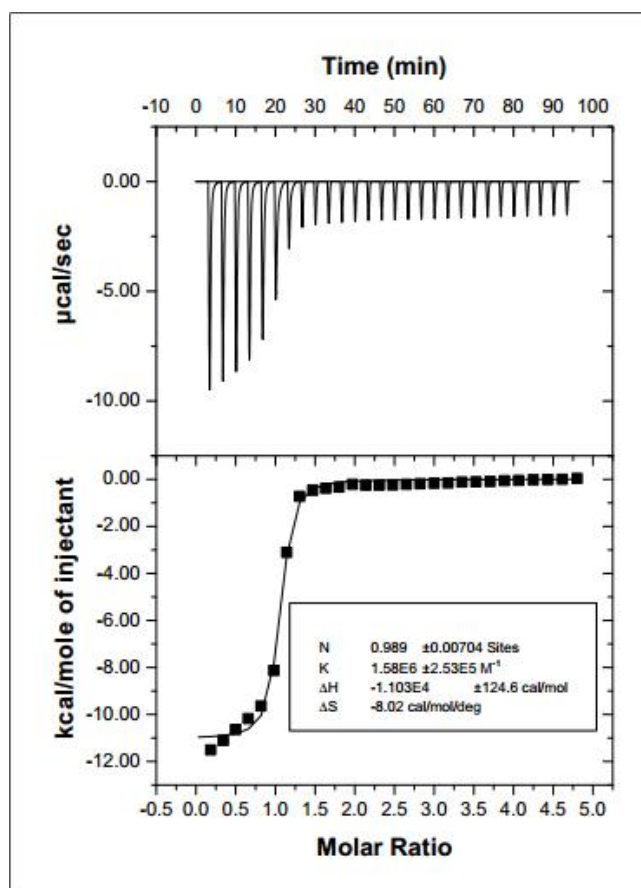

**Fig. S13** Microcalorimetric titration of **M1H** with **WP5** in water at 298.15 K. (Top) Raw ITC data for 29 sequential injections (10 µL per injection) of an **M1H** solution (2.00 mM) into a **WP5** solution (0.100 mM). (Bottom) Net reaction heat obtained from the integration of the calorimetric traces.

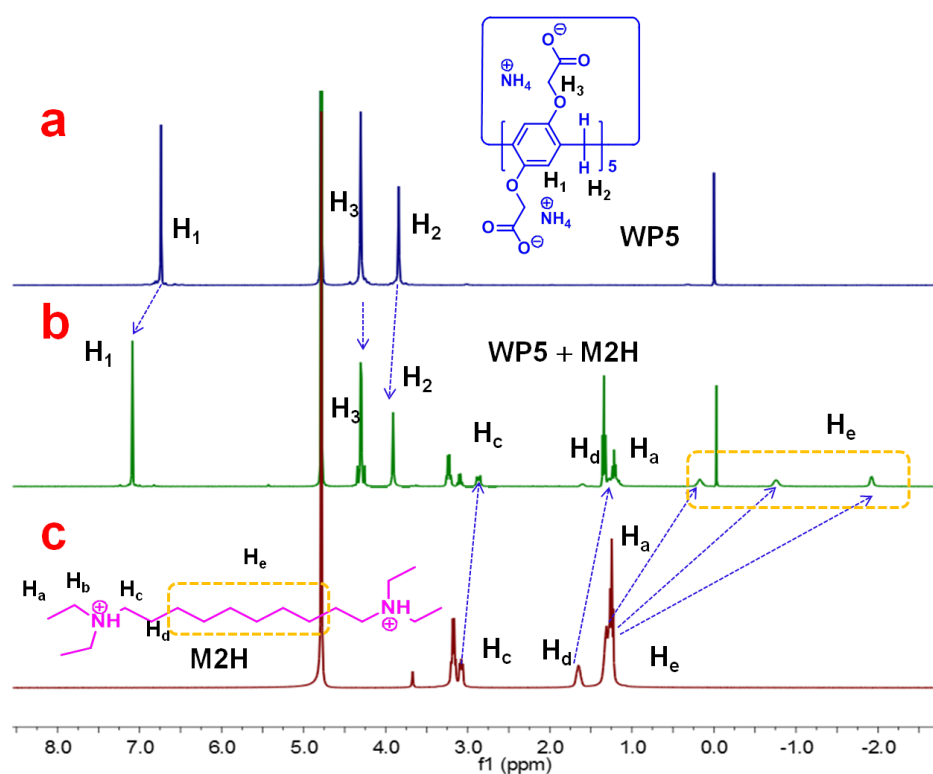

**Fig. S14** Partial  $^1\text{H}$  NMR spectra (400 MHz,  $\text{D}_2\text{O}$ , room temperature): (a) **WP5** (2.00 mM); (b) **WP5** (2.00 mM) and **M2H** (6.00 mM); (c) **M2H** (2.00 mM).

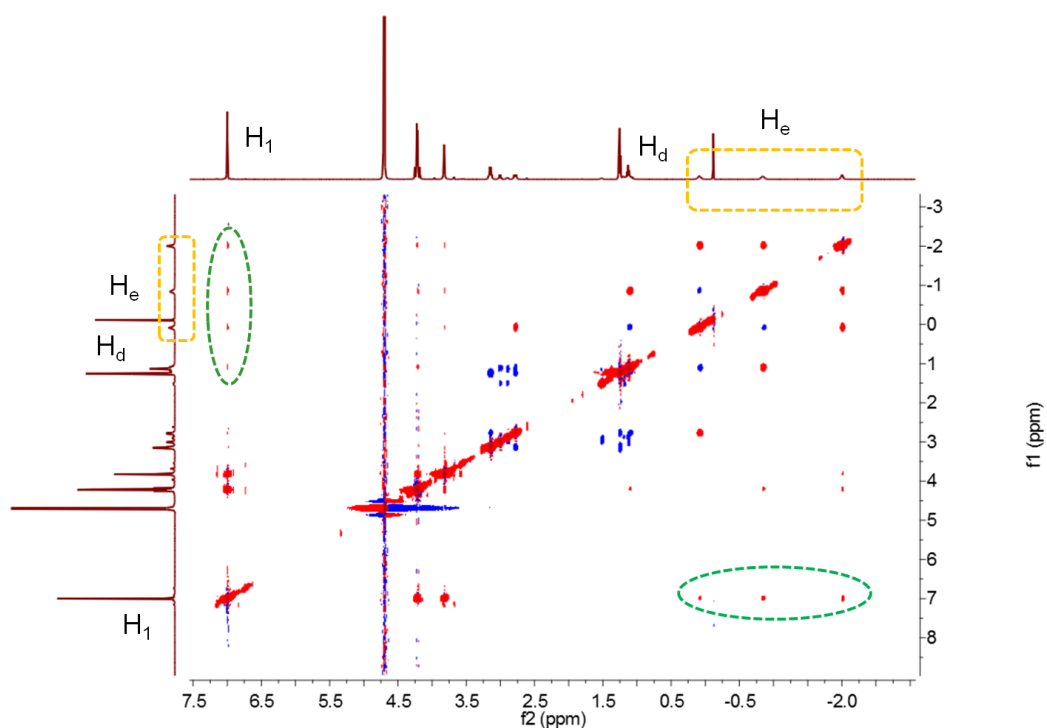

**Fig. S15** 2D NOESY NMR (500 MHz,  $\text{D}_2\text{O}$ , 293 K) spectrum of a solution of **WP5** (5.00 mM) and **M2H** (5.00 mM).

*References:*

- S1. (a) Y. Yao, X. Chi, Y. Zhou and F. Huang, *Chem. Sci.*, 2014, **5**, 2778; (b) P. Wang, Z. Li and X. Ji, *Chem. Commun.*, 2014, **50**, 13114.
